# Supplementary material for: Host Plants Identification for Adult Agrotis ipsilon, a Long-Distance Migratory Insect
Source: MDPI journal article supplement (doi:10.3390/ijms17060851), 2016-06-02
Supplement: s1 [file s1]

# Supplementary Materials: Host Plants Identification for Adult *Agrotis ipsilon*, a Long-Distance Migratory Insect

Yongqiang Liu, Xiaowei Fu, Limi Mao, Zhenlong Xing and Kongming Wu

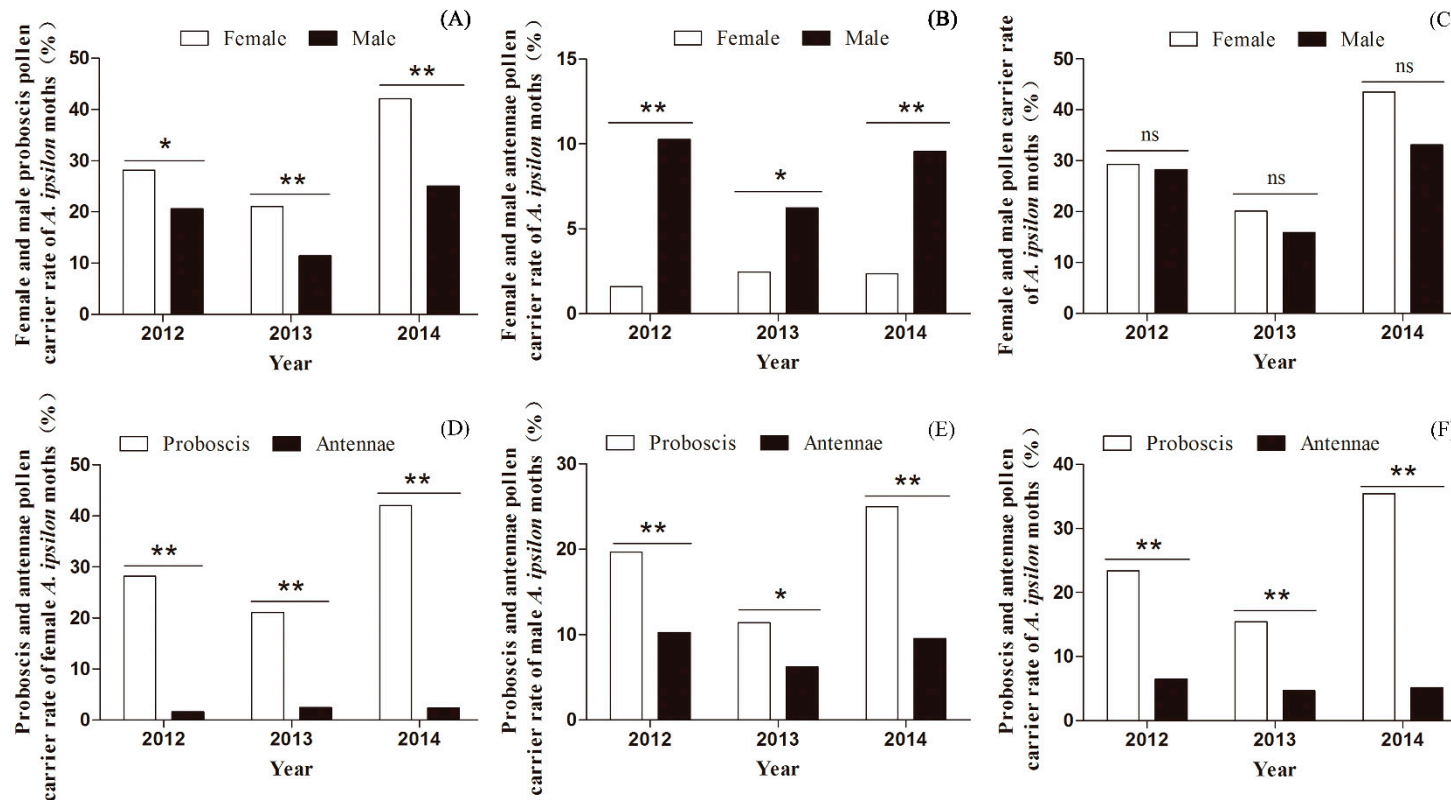

**Figure S1.** Frequencies of pollen deposition on female and male proboscises (A), antennae (B) and total (proboscis and antennae) (C) of *A. ipsilon* moths; Frequencies of pollen deposition on proboscis and antennae of female (D), male (E) and total (female and male) (F) of *A. ipsilon* moths. Single asterisk (\*) or double asterisks (\*\*) indicates there was significant difference at the 5% or 1% level as determined by chi-squared test, and ns indicates there was no significant difference.
